# Supplementary material for: The production and electrochemical performance analysis of an O3-NaTi0.2Mn0.2Fe0.2Ni0.2Co0.2O2 high-entropy oxide cathode for Na-ion batteries
Source: Royal Society of Chemistry journal article supplement (doi:10.1039/d6ra02449a), 2026-05-26
Supplement: d6ra02449a1.pdf [file d6ra02449a1.pdf]

## The production and electrochemical performance analysis of O3-NaTi<sub>0.2</sub>Mn<sub>0.2</sub>Fe<sub>0.2</sub>Ni<sub>0.2</sub>Co<sub>0.2</sub>O<sub>2</sub> High entropy oxide cathode for Na-ion battery

Ali Topal<sup>1</sup>, Abdul Naveed<sup>1,2</sup>, Crispin Hetherington<sup>3</sup>, Rachel Gouttebaron<sup>4</sup>, Sevda Sahinbay<sup>5\*</sup>, Serdar Altin<sup>1,6\*</sup>

<sup>1</sup>Physics Department, Inonu University, Battalgazi, Malatya 44280, Türkiye

<sup>2</sup>Department of Chemistry, Quaid-i-Azam University, Islamabad 45320, Pakistan.

<sup>3</sup>Centre for Analysis and Synthesis, Department of Chemistry, Lund University, 221 00 Lund, Sweden

<sup>4</sup>Synthesis, irradiation & analysis of materials (SIAM) technological platform, University of Namur, Rue de Bruxelles 61, Namur 5000, Belgium

<sup>5</sup>Physics Engineering Department, Istanbul Technical University, Istanbul 34467, Türkiye

<sup>6</sup>Battery Technology Application and Research Center, Inonu University, Battalgazi, Malatya 44280, Türkiye

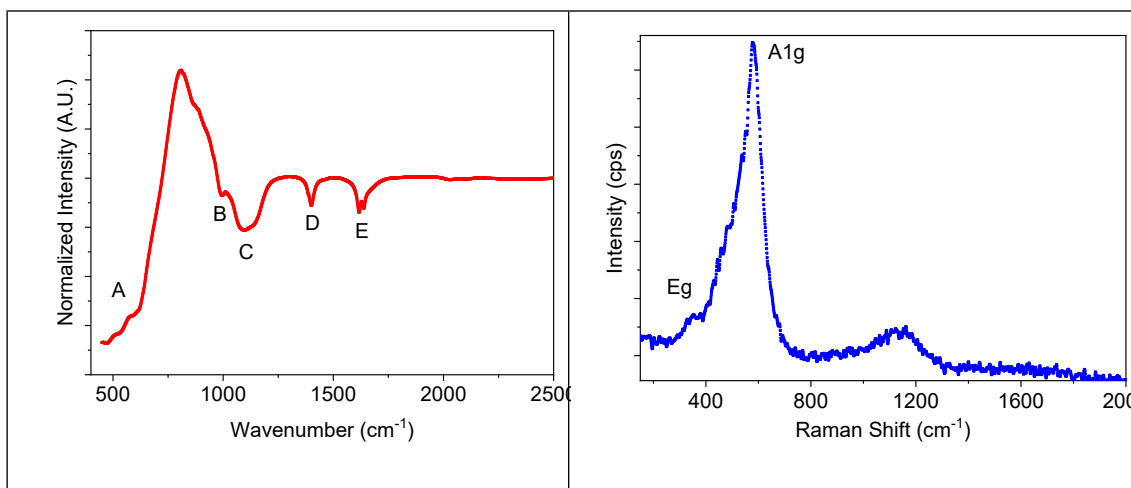

**Figure S1.** FTIR and Raman analysis of HEO powders

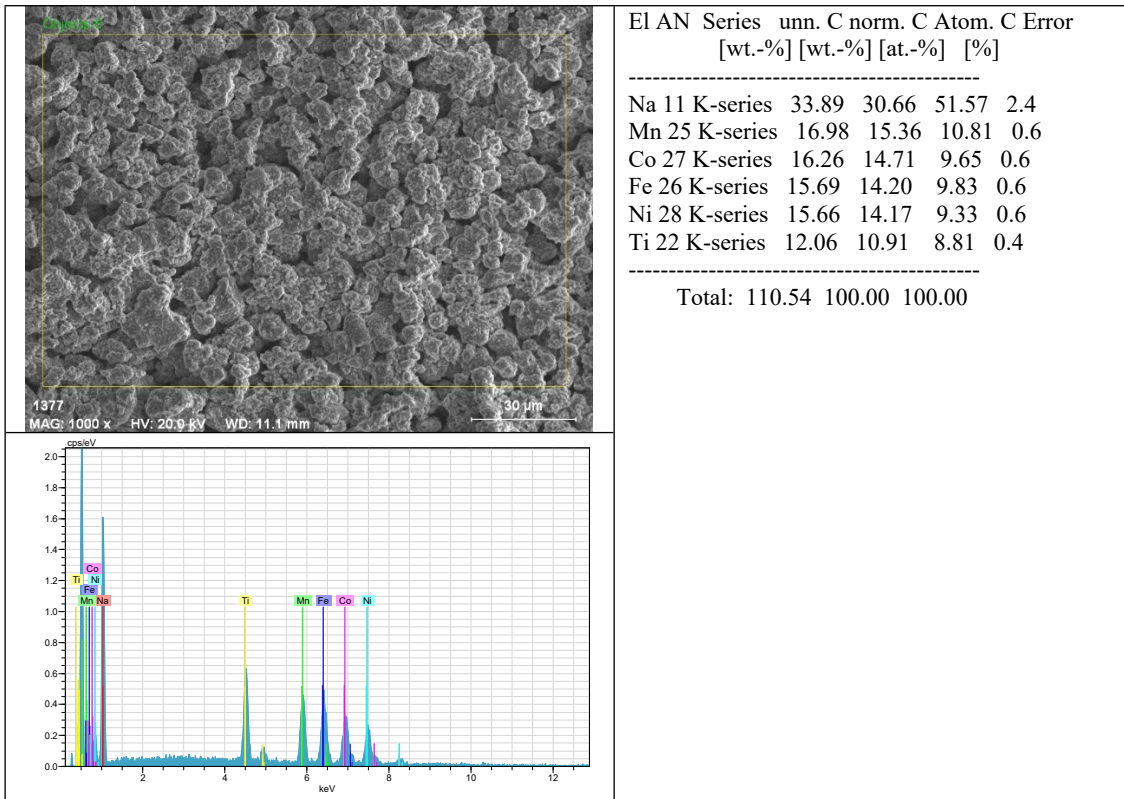

**Figure S2.** EDX dot mapping analysis results of HEO powders

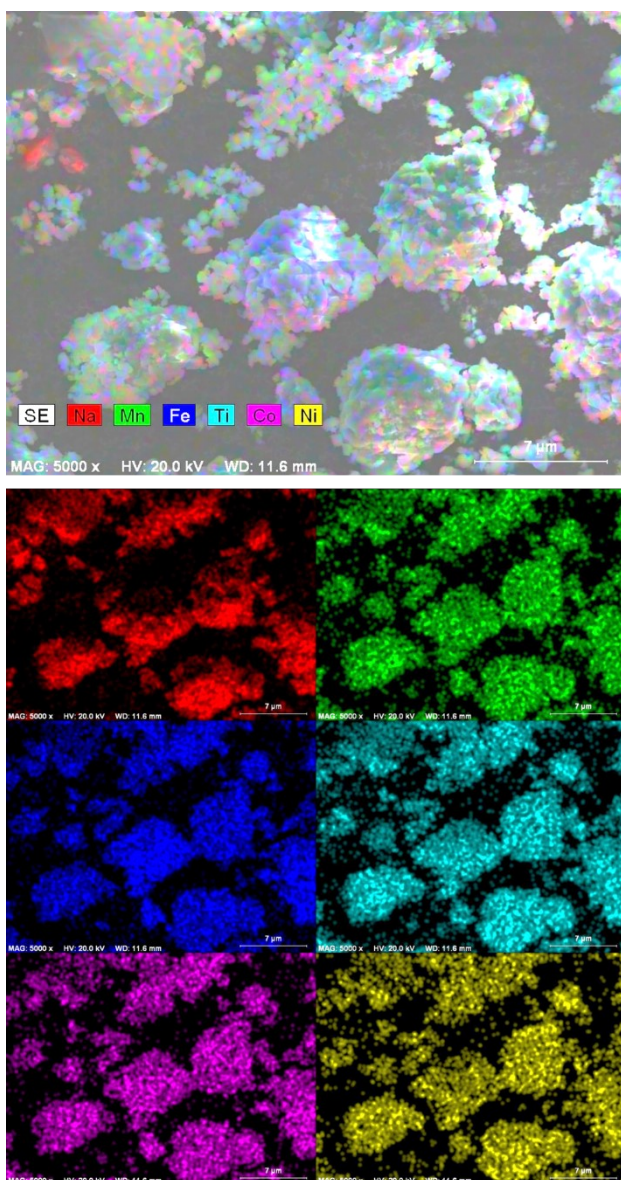

**Figure S3.** Elemental mapping

**Table S1.** XPS analysis of the HEO sample

| Element | Oxidation | Peaks             | area    | %     |
|---------|-----------|-------------------|---------|-------|
| Co      | +2        | 2p <sub>3/2</sub> | 2456.17 | 47.83 |
|         | +3        | 2p <sub>3/2</sub> | 2679.16 | 52.17 |
|         | +2        | 2p <sub>1/2</sub> | 1230.24 | 47.83 |
|         | +3        | 2p <sub>1/2</sub> | 1342.03 | 52.17 |
| Fe      | +2        | 2p <sub>3/2</sub> | 4149.01 | 73.97 |
|         | +3        | 2p <sub>3/2</sub> | 1460.03 | 26.03 |
|         | +2        | 2p <sub>1/2</sub> | 2076.76 | 73.97 |
|         | +3        | 2p <sub>1/2</sub> | 730.96  | 26.03 |
|         |           |                   |         |       |

|    |    |                   |         |       |
|----|----|-------------------|---------|-------|
| Ni | +2 | 2p <sub>3/2</sub> | 2908.93 | 70.25 |
|    | +3 | 2p <sub>3/2</sub> | 1232.06 | 29.75 |
|    | +2 | 2p <sub>1/2</sub> | 1458.56 | 70.24 |
|    | +3 | 2p <sub>1/2</sub> | 617.85  | 29.76 |

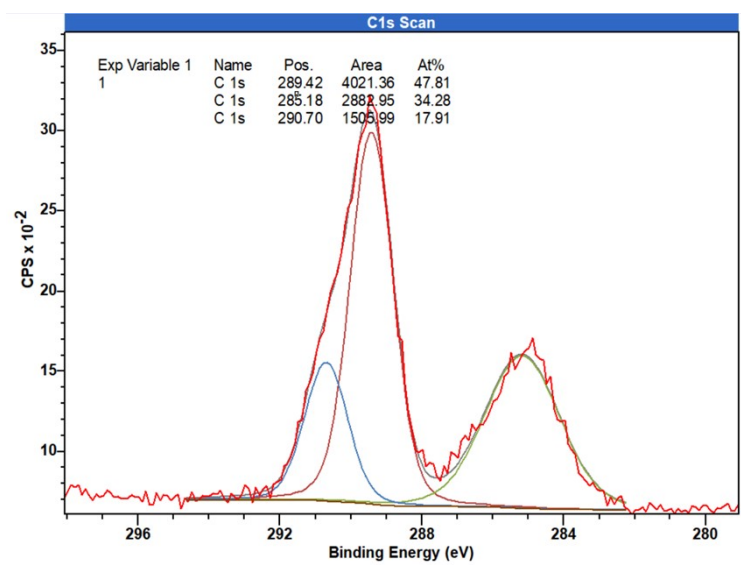

**Figure S5.** C1s XPS spectrum of the sample

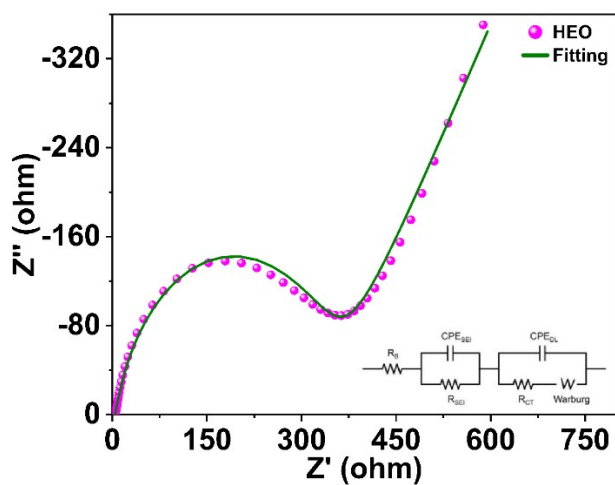

**Figure S4.** EIS of HEO half cell with the equivalent circuit model in the inset.

**Table S2.** EIS model analysis result

| <i>Parameter</i> | <i>Value</i> |
|------------------|--------------|
| Rs               | 7.70E+00     |
| R1               | 8.77E+02     |
| Qy1              | 1.20E-05     |
| Qa1              | 8.70E-01     |
| R2               | 5.07E-12     |
| W                | 1.14E-03     |
| Qy2              | 2.01E-04     |
| Qa2              | 1.53E+00     |
